# Supplementary material
Source: ML conference proceedings conference paper supplement (https://proceedings.mlr.press/v100/chen20a.html)
Supplement: Supplementary file 1 [file chen20a-supp.zip]

Archive with 2 entries (2 files):
- corl.mp4
- dian_chen19Supplement.pdf
